# Supplementary material for: Comparative Binding Ability of Human Monoclonal Antibodies against Omicron Variants of SARS-CoV-2: An In Silico Investigation
Source: MDPI journal article supplement (doi:10.3390/antib12010017), 2023-02-23
Supplement: s1 [file s1]

## Supplementary materials

**Table S1.** Molecular docking studies of efficacious mAbs against the native spike protein of SARS-CoV-2.

| Sl. No. | Native SARS-CoV-2    | Interacting Monoclonal Antibody | Haddock 2.4 score |
|---------|----------------------|---------------------------------|-------------------|
| 1.      | Wild-type SARS-CoV-2 | Bamlanivimab                    | -88.6 +/- 5.5     |
| 2.      |                      | Regdanvimab                     | -129.5 +/- 10.6   |
| 3.      |                      | Tixagevimab                     | -56.8 +/- 8.6     |
| 4.      |                      | Cilgavimab                      | -89.3 +/- 9.6     |
| 5.      |                      | Etesevimab                      | -97.1 +/- 5.2     |
| 6.      |                      | Casirivimab                     | -66.5 +/- 1.9     |
| 7.      |                      | Imdevimab                       | -80.2 +/- 6.4     |
| 8.      |                      | Sotrovimab                      | -127.5 +/- 4.9    |
| 9.      |                      | Adintrevimab                    | -125.2 +/- 4.0    |
| 10.     |                      | Beludavimab                     | -102.6 +/- 7.5    |
| 11.     |                      | Lomtegovimab                    | -111.4 +/- 10.3   |
| 12.     |                      | Romlusevimab                    | -98.5 +/- 5.1     |

**Table S2.** Molecular docking-based screening of the efficacious mAbs against the mutant spike protein from the Omicron variants of SARS-CoV-2 (Haddock score < -100.00).

| Sl. No. | Lineage of SARS-CoV-2 Strain | Spike protein with mutation | Interacting Monoclonal Antibody | Haddock 2.4 score      |
|---------|------------------------------|-----------------------------|---------------------------------|------------------------|
| 1.      | B.1.1529<br>(Omicron)        | A67V                        | Bamlanivimab                    | -28.9 +/- 7.7          |
|         |                              | D614G                       |                                 | -92.5 +/- 6.6          |
|         |                              | D796K                       |                                 | -32.2 +/- 17.5         |
|         |                              | E484A                       |                                 | -53.1 +/- 4.1          |
|         |                              | G142D                       |                                 | -57.7 +/- 9.8          |
|         |                              | G339D                       |                                 | -95.3 +/- 6.6          |
|         |                              | G446S                       |                                 | -89.0 +/- 2.0          |
|         |                              | G496S                       |                                 | -45.3 +/- 5.8          |
|         |                              | H655Y                       |                                 | -8.1 +/- 23.4          |
|         |                              | HV69-70del                  |                                 | 22.5 +/- 14.6          |
|         |                              | ins214EPE                   |                                 | -8.8 +/- 12.2          |
|         |                              | <b>K417N</b>                |                                 | <b>-106.7 +/- 6.5</b>  |
|         |                              | L212I                       |                                 | 11.4 +/- 18.2          |
|         |                              | L981F                       |                                 | -25.0 +/- 14.8         |
|         |                              | N211del                     |                                 | -8.9 +/- 9.1           |
|         |                              | N440K                       |                                 | -60.3 +/- 6.1          |
|         |                              | N501Y                       |                                 | -91.8 +/- 6.8          |
|         |                              | N679K                       |                                 | -2.7 +/- 35.6          |
|         |                              | N764K                       |                                 | -20.4 +/- 5.8          |
|         |                              | N856K                       |                                 | -22.9 +/- 4.3          |
|         |                              | N969K                       |                                 | -40.4 +/- 25.4         |
|         |                              | <b>P681H</b>                |                                 | <b>-104.8 +/- 6.4</b>  |
|         |                              | Q493R                       |                                 | -80.4 +/- 1.5          |
|         |                              | Q498R                       |                                 | -41.0 +/- 6.1          |
|         |                              | Q954H                       |                                 | -0.6 +/- 37.0          |
|         |                              | <b>S371L</b>                |                                 | <b>-106.4 +/- 6.2</b>  |
|         |                              | S373P                       |                                 | -47.9 +/- 6.4          |
|         |                              | S375F                       |                                 | -91.8 +/- 1.8          |
|         |                              | S477N                       |                                 | -98.4 +/- 7.7          |
|         |                              | T95I                        |                                 | -26.2 +/- 8.5          |
|         |                              | T478K                       |                                 | -99.5 +/- 8.8          |
|         |                              | T547K                       |                                 | -2.9 +/- 13.1          |
|         |                              | VYY143-145                  |                                 | -22.6 +/- 24.4         |
|         |                              | Y505H                       |                                 | -47.9 +/- 20.1         |
|         |                              | MULTIVERSE                  |                                 | -69.2 +/- 4.4          |
| 2.      |                              | A67V                        | Regdanvimab                     | -81.2 +/- 6.1          |
|         |                              | <b>D614G</b>                |                                 | <b>-126.1 +/- 20.4</b> |

|    |  |            |                   |                        |
|----|--|------------|-------------------|------------------------|
|    |  |            | D796K             | -92.5 +/- 11.0         |
|    |  |            | <b>E484A</b>      | <b>-135.4 +/- 17.8</b> |
|    |  |            | <b>G142D</b>      | <b>-118.4 +/- 9.4</b>  |
|    |  |            | <b>G339D</b>      | <b>-120.9 +/- 7.5</b>  |
|    |  |            | <b>G446S</b>      | <b>-131.7 +/- 8.5</b>  |
|    |  |            | <b>G496S</b>      | <b>-108.5 +/- 10.5</b> |
|    |  |            | H655Y             | -86.5 +/- 10.9         |
|    |  |            | HV69-70del        | -37.7 +/- 9.0          |
|    |  |            | ins214EPE         | -67.5 +/- 15.9         |
|    |  |            | <b>K417N</b>      | <b>-122.4 +/- 7.9</b>  |
|    |  |            | L212I             | -55.6 +/- 26.8         |
|    |  |            | L981F             | -39.6 +/- 9.2          |
|    |  |            | N211del           | -99.3 +/- 17.2         |
|    |  |            | <b>N440K</b>      | <b>-118.0 +/- 17.7</b> |
|    |  |            | <b>N501Y</b>      | <b>-121.3 ± 8.0</b>    |
|    |  |            | <b>N679K</b>      | <b>-111.1 +/- 18.8</b> |
|    |  |            | N764K             | -54.8 +/- 7.8          |
|    |  |            | N856K             | -17.3 +/- 26.6         |
|    |  |            | N969K             | -87.0 +/- 18.2         |
|    |  |            | <b>P681H</b>      | <b>-137.2 ± 8.1</b>    |
|    |  |            | <b>Q493R</b>      | <b>-113.4 +/- 7.8</b>  |
|    |  |            | <b>Q498R</b>      | <b>-131.3 +/- 9.6</b>  |
|    |  |            | Q954H             | -57.1 +/- 12.5         |
|    |  |            | <b>S371L</b>      | <b>-123.5 +/- 3.7</b>  |
|    |  |            | <b>S373P</b>      | <b>-109.8 +/- 9.0</b>  |
|    |  |            | <b>S375F</b>      | <b>-122.5 +/- 7.7</b>  |
|    |  |            | <b>S477N</b>      | <b>-121.1 +/- 5.6</b>  |
|    |  |            | T95I              | -3.3 +/- 55.7          |
|    |  |            | <b>T478K</b>      | <b>-124.9 +/- 9.3</b>  |
|    |  |            | T547K             | -49.2 +/- 8.0          |
|    |  |            | VYY143-145        | -21.1 +/- 34.1         |
|    |  |            | <b>Y505H</b>      | <b>-109.5 +/- 5.5</b>  |
|    |  |            | <b>MULTIVERSE</b> | <b>-147.6 +/- 13.5</b> |
|    |  |            | A67V              | -25.6 +/- 4.3          |
|    |  |            | D614G             | -66.1 +/- 17.2         |
|    |  |            | D796K             | -57.6 +/- 18.6         |
|    |  |            | E484A             | -72.0 +/- 8.4          |
|    |  |            | <b>G142D</b>      | <b>-112.0 +/- 14.4</b> |
|    |  |            | G339D             | -97.0 +/- 7.4          |
|    |  |            | G446S             | -82.9 +/- 5.9          |
|    |  |            | G496S             | -80.6 +/- 9.9          |
|    |  |            | H655Y             | -41.9 +/- 39.8         |
|    |  |            | HV69-70del        | -50.7 +/- 37.1         |
|    |  |            | ins214EPE         | -77.2 +/- 18.0         |
|    |  |            | K417N             | -87.3 +/- 3.6          |
|    |  |            | L212I             | -57.0 +/- 9.7          |
|    |  |            | L981F             | -58.5 +/- 19.7         |
|    |  |            | N211del           | 17.0 +/- 23.3          |
| 3. |  |            | N440K             | -60.5 +/- 5.0          |
|    |  | Cilgavimab | N501Y             | -83.4 +/- 9.9          |
|    |  |            | N679K             | -15.1 +/- 56.3         |
|    |  |            | N764K             | -32.7 +/- 33.8         |
|    |  |            | N856K             | -44.7 +/- 32.7         |
|    |  |            | N969K             | -55.9 +/- 22.1         |
|    |  |            | P681H             | -76.9 +/- 8.1          |
|    |  |            | Q493R             | -84.5 +/- 5.7          |
|    |  |            | Q498R             | -71.1 +/- 16.7         |
|    |  |            | Q954H             | -84.5 +/- 5.7          |
|    |  |            | S371L             | -73.1 +/- 16.7         |
|    |  |            | S373P             | -64.7 +/- 12.4         |
|    |  |            | S375F             | -72.8 +/- 4.3          |
|    |  |            | S477N             | -68.0 +/- 12.1         |
|    |  |            | T95I              | -87.4 +/- 5.8          |
|    |  |            | T478K             | -83.3 +/- 5.9          |

|    |  |            |              |                        |
|----|--|------------|--------------|------------------------|
|    |  |            | T547K        | -66.9 +/- 26.8         |
|    |  |            | VYY143-145   | -82.5 +/- 16.0         |
|    |  |            | Y505H        | -67.5 +/- 15.9         |
|    |  |            | MULTIVERSE   | -97.3 +/- 4.7          |
| 4. |  | Etesevimab | A67V         | 13.9 +/- 12.4          |
|    |  |            | <b>D614G</b> | <b>-139.0 +/- 3.2</b>  |
|    |  |            | D796K        | 24.7 +/- 13.5          |
|    |  |            | E484A        | -23.9 +/- 11.9         |
|    |  |            | G142D        | -48.8 +/- 2.6          |
|    |  |            | <b>G339D</b> | <b>-102.0 +/- 5.8</b>  |
|    |  |            | G446S        | -95.2 +/- 2.7          |
|    |  |            | G496S        | -27.0 +/- 7.5          |
|    |  |            | H655Y        | 24.0 +/- 14.5          |
|    |  |            | HV69-70del   | -10.1 +/- 17.1         |
|    |  |            | ins214EPE    | -0.5 +/- 11.8          |
|    |  |            | <b>K417N</b> | <b>-109.4 +/- 3.7</b>  |
|    |  |            | L212I        | -40.0 +/- 15.2         |
|    |  |            | L981F        | 14.9 +/- 6.3           |
|    |  |            | N211del      | 39.3 +/- 8.5           |
|    |  |            | N440K        | -30.0 +/- 14.2         |
|    |  |            | N501Y        | -58.1 +/- 13.8         |
|    |  |            | N679K        | -30.2 +/- 7.1          |
|    |  |            | N764K        | 19.7 +/- 2.9           |
|    |  |            | N856K        | 12.0 +/- 15.6          |
|    |  |            | N969K        | -18.1 +/- 6.3          |
|    |  |            | <b>P681H</b> | <b>-113.1 +/- 2.3</b>  |
|    |  |            | Q493R        | -95.0 +/- 2.6          |
|    |  |            | Q498R        | -41.0 +/- 4.6          |
|    |  |            | Q954H        | 35.2 +/- 17.1          |
|    |  |            | <b>S371L</b> | <b>-110.4 +/- 2.5</b>  |
|    |  |            | S373P        | -37.1 +/- 4.1          |
|    |  |            | <b>S375F</b> | <b>-109.3 +/- 6.4</b>  |
|    |  |            | <b>S477N</b> | <b>-100.7 +/- 2.5</b>  |
|    |  |            | T95I         | -28.3 +/- 22.6         |
|    |  |            | <b>T478K</b> | <b>-102.6 +/- 3.2</b>  |
|    |  |            | T547K        | -25.9 +/- 43.3         |
|    |  |            | VYY143-145   | -41.0 +/- 19.9         |
|    |  |            | Y505H        | -39.5 +/- 9.3          |
|    |  |            | MULTIVERSE   | -91.4 +/- 5.0          |
| 5. |  | Sotrovimab | A67V         | -39.7 +/- 34.0         |
|    |  |            | D614G        | -67.1 +/- 14.4         |
|    |  |            | D796K        | 7.5 +/- 46.3           |
|    |  |            | E484A        | -95.2 +/- 9.5          |
|    |  |            | <b>G142D</b> | <b>-118.2 +/- 6.9</b>  |
|    |  |            | G339D        | -78.8 +/- 6.4          |
|    |  |            | <b>G446S</b> | <b>-100.3 +/- 7.3</b>  |
|    |  |            | G496S        | -86.9 +/- 6.7          |
|    |  |            | H655Y        | 0.4 +/- 53.2           |
|    |  |            | HV69-70del   | -15.1 +/- 22.5         |
|    |  |            | ins214EPE    | -6.2 +/- 46.3          |
|    |  |            | <b>K417N</b> | <b>-123.2 +/- 5.5</b>  |
|    |  |            | L212I        | -26.5 +/- 28.1         |
|    |  |            | L981F        | -71.8 +/- 11.3         |
|    |  |            | N211del      | -46.5 +/- 4.4          |
|    |  |            | N440K        | -26.5 +/- 13.1         |
|    |  |            | <b>N501Y</b> | <b>-112.3 +/- 2.7</b>  |
|    |  |            | N679K        | -17.7 +/- 53.0         |
|    |  |            | N764K        | -64.0 +/- 13.9         |
|    |  |            | N856K        | -46.7 +/- 10.2         |
|    |  |            | N969K        | -52.0 +/- 6.5          |
|    |  |            | <b>P681H</b> | <b>-129.0 +/- 14.7</b> |
|    |  |            | <b>Q493R</b> | <b>-135.1 +/- 8.0</b>  |
|    |  |            | Q498R        | -97.3 +/- 7.2          |
|    |  |            | Q954H        | -45.0 +/- 47.7         |

6.

|                   |                        |
|-------------------|------------------------|
| <b>S371L</b>      | <b>-123.1 +/- 3.9</b>  |
| <b>S373P</b>      | <b>-102.1 +/- 4.5</b>  |
| <b>S375F</b>      | <b>-129.0 +/- 11.9</b> |
| <b>S477N</b>      | <b>-128.6 +/- 2.3</b>  |
| T95I              | -30.9 +/- 49.5         |
| <b>T478K</b>      | <b>-133.5 +/- 9.1</b>  |
| T547K             | -56.9 +/- 20.2         |
| VYY143-145        | -31.6 +/- 8.5          |
| <b>Y505H</b>      | <b>-101.9 +/- 3.7</b>  |
| <b>MULTIVERSE</b> | <b>-108.9 +/- 10.1</b> |

|                   |                        |
|-------------------|------------------------|
| A67V              | -47.3 +/- 10.9         |
| <b>D614G</b>      | <b>-119.9 +/- 2.6</b>  |
| D796K             | -53.5 +/- 7.1          |
| E484A             | -80.0 +/- 21.3         |
| <b>G142D</b>      | <b>-112.2 +/- 11.4</b> |
| <b>G339D</b>      | <b>-113.7 +/- 5.7</b>  |
| <b>G446S</b>      | <b>-110.9 +/- 5.0</b>  |
| G496S             | -73.6 +/- 9.4          |
| H655Y             | -51.2 +/- 24.3         |
| HV69-70del        | -57.8 +/- 14.7         |
| ins214EPE         | -56.2 +/- 6.3          |
| <b>K417N</b>      | <b>-102.1 +/- 6.7</b>  |
| L212I             | -49.7 +/- 16.0         |
| L981F             | -53.5 +/- 4.1          |
| N211del           | -30.7 +/- 20.1         |
| N440K             | -59.4 +/- 19.0         |
| N501Y             | -52.7 +/- 15.0         |
| N679K             | -29.4 +/- 20.3         |
| N764K             | -64.3 +/- 11.7         |
| N856K             | -0.8 +/- 12.3          |
| N969K             | -19.9 +/- 4.2          |
| <b>P681H</b>      | <b>-118.2 +/- 8.0</b>  |
| <b>Q493R</b>      | <b>-102.8 +/- 15.0</b> |
| Q498R             | -78.0 +/- 12.1         |
| Q954H             | -12.4 +/- 7.3          |
| <b>S371L</b>      | <b>-113.7 +/- 1.8</b>  |
| S373P             | -96.8 +/- 5.6          |
| <b>S375F</b>      | <b>-103.5 +/- 2.9</b>  |
| <b>S477N</b>      | <b>-114.9 +/- 3.4</b>  |
| T95I              | -35.2 +/- 13.7         |
| <b>T478K</b>      | <b>-100.9 +/- 7.7</b>  |
| T547K             | -45.0 +/- 6.9          |
| VYY143-145        | -56.2 +/- 13.2         |
| Y505H             | -69.0 +/- 19.0         |
| <b>MULTIVERSE</b> | <b>-110.0 +/- 3.6</b>  |

Adintrevimab

7.

|              |                       |
|--------------|-----------------------|
| A67V         | -75.4 +/- 13.4        |
| <b>D614G</b> | <b>-138.6 +/- 2.3</b> |
| D796K        | -40.5 +/- 14.1        |
| <b>E484A</b> | <b>-111.9 +/- 6.9</b> |
| <b>G142D</b> | <b>-116.7 +/- 8.4</b> |
| <b>G339D</b> | <b>-101.4 +/- 4.5</b> |
| <b>G446S</b> | <b>-106.7 +/- 7.4</b> |
| <b>G496S</b> | <b>-108.0 +/- 2.0</b> |
| H655Y        | -60.4 +/- 4.3         |
| HV69-70del   | -23.1 +/- 15.7        |
| ins214EPE    | -20.0 +/- 12.8        |
| K417N        | -91.6 +/- 2.5         |
| L212I        | -33.1 +/- 7.4         |
| L981F        | -36.9 +/- 14.1        |
| N211del      | 7.2 +/- 34.8          |
| N440K        | -86.5 +/- 5.7         |
| <b>N501Y</b> | <b>-105.0 +/- 6.4</b> |
| N679K        | 26.5 +/- 10.9         |
| N764K        | -15.4 +/- 47.1        |

Beludavimab



|    |                   |                        |
|----|-------------------|------------------------|
| 8. | N856K             | -37.1 +/- 7.6          |
|    | N969K             | -40.1 +/- 13.7         |
|    | <b>P681H</b>      | <b>-111.7 +/- 19.1</b> |
|    | <b>Q493R</b>      | <b>-106.1 +/- 4.6</b>  |
|    | Q498R             | -98.2 +/- 3.4          |
|    | Q954H             | 2.9 +/- 25.1           |
|    | <b>S371L</b>      | <b>-101.6 +/- 4.9</b>  |
|    | <b>S373P</b>      | <b>-103.0 +/- 6.9</b>  |
|    | <b>S375F</b>      | <b>-116.4 +/- 11.9</b> |
|    | <b>S477N</b>      | <b>-105.1 +/- 5.2</b>  |
|    | T95I              | -42.3 +/- 12.5         |
|    | T478K             | -99.1 +/- 5.5          |
|    | T547K             | -7.7 +/- 39.4          |
|    | VYY143-145        | -17.2 +/- 14.0         |
|    | <b>Y505H</b>      | <b>-108.7 +/- 11.9</b> |
|    | <b>MULTIVERSE</b> | <b>-129.8 +/- 1.8</b>  |
|    | A67V              | -35.8 +/- 6.6          |
|    | D614G             | -88.1 +/- 4.0          |
|    | D796K             | 33.2 +/- 8.1           |
|    | E484A             | -92.5 +/- 5.7          |
| 9. | G142D             | -90.6 +/- 4.1          |
|    | G339D             | -71.2 +/- 10.2         |
|    | G446S             | -75.3 +/- 25.5         |
|    | G496S             | -68.8 +/- 4.7          |
|    | H655Y             | 21.3 +/- 36.4          |
|    | HV69-70del        | 54.4 +/- 6.2           |
|    | ins214EPE         | 60.2 +/- 10.6          |
|    | K417N             | -85.4 +/- 21.3         |
|    | L212I             | 28.5 +/- 13.4          |
|    | L981F             | 31.1 +/- 13.0          |
|    | N211del           | 39.8 +/- 14.6          |
|    | N440K             | -52.8 +/- 5.5          |
|    | N501Y             | -48.4 +/- 20.7         |
|    | N679K             | 21.9 +/- 55.0          |
|    | N764K             | 38.8 +/- 7.4           |
|    | N856K             | 23.0 +/- 5.4           |
|    | N969K             | 35.5 +/- 6.7           |
|    | P681H             | -95.7 +/- 17.2         |
|    | <b>Q493R</b>      | <b>-123.9 +/- 5.2</b>  |
|    | Q498R             | -62.3 +/- 4.5          |
|    | Q954H             | 26.6 +/- 4.3           |
|    | S371L             | -81.5 +/- 12.5         |
|    | S373P             | -76.0 +/- 19.9         |
|    | <b>S375F</b>      | <b>-103.1 +/- 8.7</b>  |
|    | <b>S477N</b>      | <b>-125.1 +/- 3.6</b>  |
|    | T95I              | 27.1 +/- 7.2           |
|    | <b>T478K</b>      | <b>-103.4 +/- 3.6</b>  |
|    | T547K             | 31.1 +/- 45.9          |
|    | VYY143-145        | 34.2 +/- 32.1          |
|    | Y505H             | -67.9 +/- 5.9          |
|    | <b>MULTIVERSE</b> | <b>-112.4 +/- 2.4</b>  |
|    | A67V              | 3.2 +/- 8.3            |
|    | <b>D614G</b>      | <b>-104.5 +/- 3.7</b>  |
|    | D796K             | 3.3 +/- 11.5           |
|    | E484A             | -47.1 +/- 9.8          |
|    | G142D             | -36.3 +/- 11.7         |
|    | <b>G339D</b>      | <b>-108.6 +/- 1.8</b>  |
|    | G446S             | -85.2 +/- 8.5          |
|    | G496S             | -51.2 +/- 5.5          |
|    | H655Y             | 14.5 +/- 7.4           |
|    | HV69-70del        | -23.3 +/- 58.6         |
|    | ins214EPE         | 14.5 +/- 2.0           |
|    | K417N             | -44.8 +/- 6.5          |
|    | L212I             | -18.1 +/- 5.0          |

|              |                       |
|--------------|-----------------------|
| L981F        | 18.1 +/- 3.6          |
| N211del      | 9.4 +/- 3.8           |
| N440K        | -47.0 +/- 3.5         |
| N501Y        | -44.7 +/- 5.9         |
| N679K        | -15.3 +/- 28.6        |
| N764K        | 22.5 +/- 7.6          |
| N856K        | 6.5 +/- 6.5           |
| N969K        | 7.6 +/- 8.8           |
| P681H        | -74.2 +/- 2.7         |
| Q493R        | -95.2 +/- 8.7         |
| Q498R        | -45.0 +/- 4.3         |
| Q954H        | 22.4 +/- 4.6          |
| S371L        | -86.3 +/- 4.9         |
| S373P        | -35.3 +/- 8.0         |
| <b>S375F</b> | <b>-103.0 +/- 6.5</b> |
| S477N        | -95.5 +/- 8.3         |
| T95I         | 5.1 +/- 17.1          |
| T478K        | -74.5 +/- 15.3        |
| T547K        | 31.3 +/- 7.8          |
| VYY143-145   | 11.9 +/- 23.4         |
| Y505H        | -60.5 +/- 20.5        |
| MULTIVERSE   | -95.3 +/- 6.7         |

**Table S3.** List of all the effective mAbs and their level of efficacy against B.1.1529 (Omicron) variants.

| Sl. No. | Lineage of SARS-CoV-2 Strain | Spike protein with mutation | Interacting Monoclonal Antibody | Binding Affinity $\Delta G$ (kcal mol <sup>-1</sup> ) | Haddock 2.4 score |
|---------|------------------------------|-----------------------------|---------------------------------|-------------------------------------------------------|-------------------|
|         | B.1.1529 (Omicron)           | K417N                       | Bamlanivimab                    | -11.1                                                 | -106.7±6.5        |
|         |                              | P681H                       |                                 | -11.9                                                 | -104.8±6.4        |
|         |                              | S371L                       |                                 | -11.1                                                 | -106.4±6.2        |
|         |                              | D614G                       | Regdanivimab                    | -13.9                                                 | -126.1±20.4       |
|         |                              | E484A                       |                                 | -15.7                                                 | -135.4±17.8       |
|         |                              | G142D                       |                                 | -9.3                                                  | -118.4±9.4        |
|         |                              | G339D                       |                                 | -10.0                                                 | -120.9±7.5        |
|         |                              | G446S                       |                                 | -12.3                                                 | -131.7±8.5        |
|         |                              | G496S                       |                                 | -9.7                                                  | -108.5±10.5       |
|         |                              | K417N                       |                                 | -11.1                                                 | -122.4±7.9        |
|         |                              | N440K                       |                                 | <b>-15.8</b>                                          | -118.0±17.7       |
|         |                              | N501Y                       |                                 | -13.7                                                 | -121.3±8.0        |
|         |                              | N679K                       |                                 | -14.9                                                 | -111.1±18.8       |
|         |                              | P681H                       |                                 | -10.3                                                 | -137.2±8.1        |
|         |                              | Q493R                       |                                 | -10.5                                                 | -113.4±7.8        |
|         |                              | Q498R                       |                                 | -14.6                                                 | -131.3±9.6        |
|         |                              | S371L                       |                                 | -10.9                                                 | -123.5±3.7        |
|         |                              | S373P                       |                                 | -8.9                                                  | -109.8±9.0        |
|         |                              | S375F                       |                                 | -10.2                                                 | -122.5±7.7        |
|         |                              | S477N                       |                                 | -11.0                                                 | -121.1±5.6        |
|         |                              | T478K                       |                                 | -12.8                                                 | -124.9±9.3        |
|         |                              | Y505H                       |                                 | -13.9                                                 | -109.5±5.5        |
|         |                              | MULTIVERSE                  |                                 | -13.0                                                 | -147.6±13.5       |
|         |                              | G142D                       | Cilgavimab                      | <b>-18.6</b>                                          | -112.0±14.4       |
|         |                              | D614G                       | Etesevimab                      | -10.9                                                 | -139.0±3.2        |
|         |                              | G339D                       |                                 | -12.8                                                 | -102.0±5.8        |
|         |                              | K417N                       |                                 | -14.1                                                 | -109.4±3.7        |
|         |                              | P681H                       |                                 | -12.6                                                 | -113.1±2.3        |
|         |                              | S371L                       |                                 | -11.4                                                 | -110.4±2.5        |
|         |                              | S375F                       |                                 | -14.3                                                 | -109.3±6.4        |
|         |                              | S477N                       |                                 | -13.3                                                 | -100.7±2.5        |
|         |                              | T478K                       |                                 | -12.7                                                 | -102.6±3.2        |

|  |            |              |       |             |
|--|------------|--------------|-------|-------------|
|  | G142D      | Sotrovimab   | -12.0 | -118.2±6.9  |
|  | G446S      |              | -10.6 | -100.3±7.3  |
|  | K417N      |              | -11.9 | -123.2±5.5  |
|  | N501Y      |              | -13.6 | -112.3±2.7  |
|  | P681H      |              | -12.7 | -129.0±14.7 |
|  | Q493R      |              | -12.2 | -135.1±8.0  |
|  | S371L      |              | -10.9 | -123.1±3.9  |
|  | S373P      |              | -10.2 | -102.1±4.5  |
|  | S375F      |              | -11.7 | -129.0±11.9 |
|  | S477N      |              | -8.6  | -128.6±2.3  |
|  | T478K      |              | -11.4 | -133.5±9.1  |
|  | Y505H      |              | -10.6 | -101.9±3.7  |
|  | MULTIVERSE |              | -9.7  | -108.9±10.1 |
|  | D614G      | Adintrevimab | -13.5 | -119.9±2.6  |
|  | G142D      |              | -13.6 | -112.2±11.4 |
|  | G339D      |              | -15.5 | -113.7±5.7  |
|  | G446S      |              | -14.7 | -110.9±5.0  |
|  | K417N      |              | -14.2 | -102.1±6.7  |
|  | P681H      |              | -14.3 | -118.2±8.0  |
|  | Q493R      |              | -10.8 | -102.8±15.0 |
|  | S371L      |              | -14.3 | -113.7±1.8  |
|  | S375F      |              | -15.1 | -103.5±2.9  |
|  | S477N      |              | -14.7 | -114.9±3.4  |
|  | T478K      |              | -14.6 | -100.9±7.7  |
|  | MULTIVERSE |              | -12.2 | -110.0±3.6  |
|  | D614G      | Beludavimab  | -13.9 | -138.6±2.3  |
|  | E484A      |              | -12.7 | -111.9±6.9  |
|  | G142D      |              | -11.5 | -116.7±8.4  |
|  | G339D      |              | -10.7 | -101.4±4.5  |
|  | G446S      |              | -13.6 | -106.7±7.4  |
|  | G496S      |              | -10.7 | -108.0±2.0  |
|  | N501Y      |              | -12.7 | -105.0±6.4  |
|  | P681H      |              | -9.4  | -111.7±19.1 |
|  | Q493R      |              | -13.6 | -106.1±4.6  |
|  | S371L      |              | -15.0 | -101.6±4.9  |
|  | S373P      |              | -12.6 | -103.0±6.9  |
|  | S375F      |              | -12.8 | -116.4±11.9 |
|  | S477N      |              | -13.8 | -105.1±11.9 |
|  | Y505H      |              | -13.0 | -108.7±11.9 |
|  | MULTIVERSE |              | -12.3 | -129.8±1.8  |
|  | Q493R      | Lomtegovimab | -14.8 | -123.9±5.2  |
|  | S375F      |              | -13.7 | -103.1±8.7  |
|  | S477N      |              | -14.7 | -125.1±3.6  |
|  | T478K      |              | -14.1 | -103.4±3.6  |
|  | MULTIVERSE |              | -15.6 | -112.4±2.4  |
|  | D614G      | Romlusevimab | -15.3 | -104.5±3.7  |
|  | G339D      |              | -12.7 | -108.6±1.8  |
|  | S375F      |              | -14.7 | -103.0±6.5  |

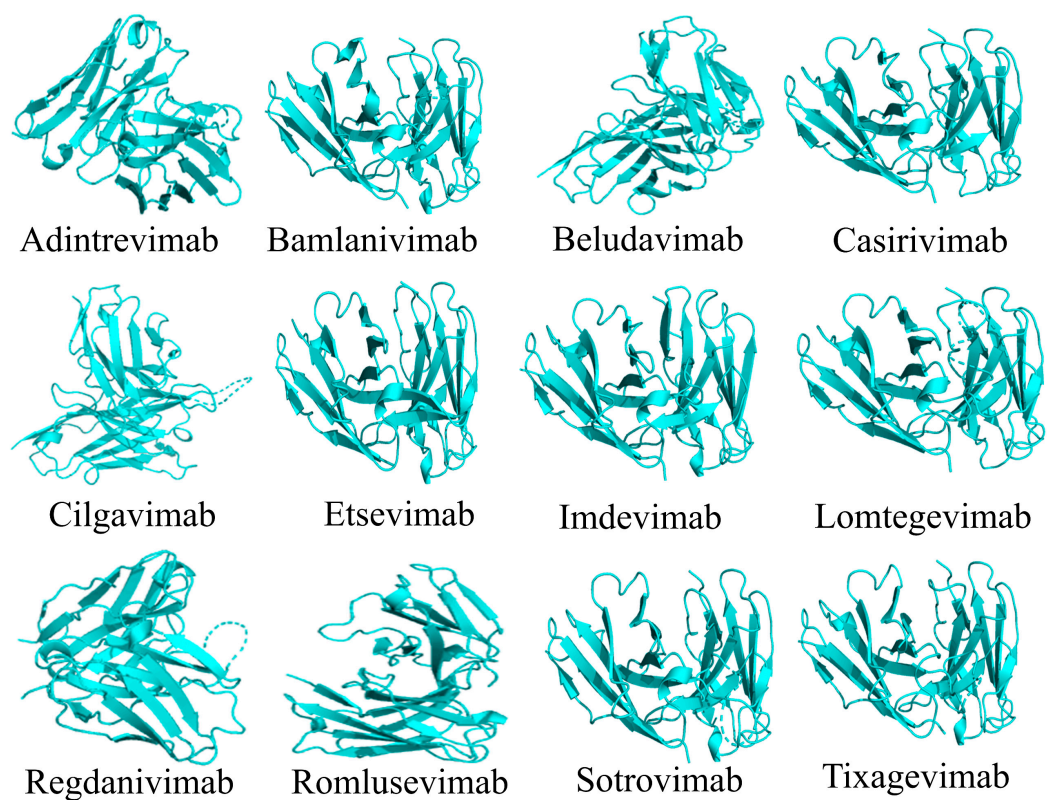

**Figure S1.** 3D conformation of all the 12 mAbs that were utilized in this study.

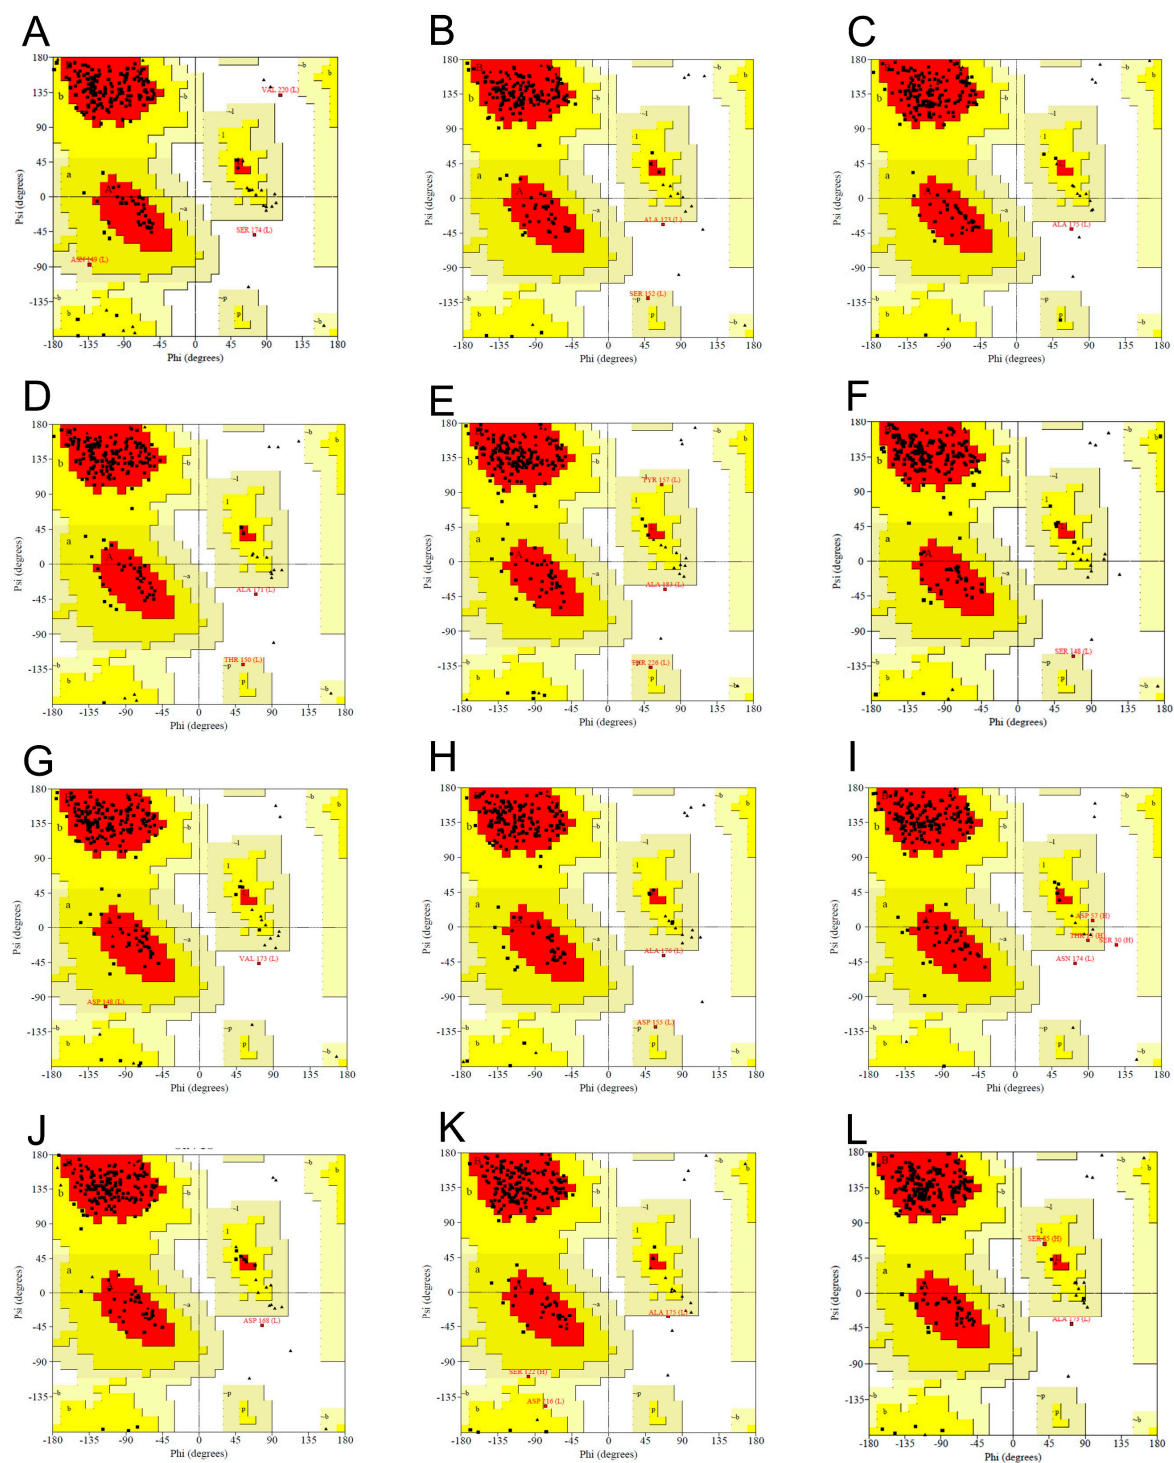

**Figure S2.** Ramachandran plots of 12 mAbs that indicate their different stereochemical stability. A. Adintrevimab, B. Bamlanivimab, C. Beludavimab, D. Casirivimab, E. cilgavimab, F. Etesevimab, G. Imdevimab, H. Lomtegovimab, I. Regdanvimab, J. romlusevimab, K. sotrovimab, L. Tixagevimab.

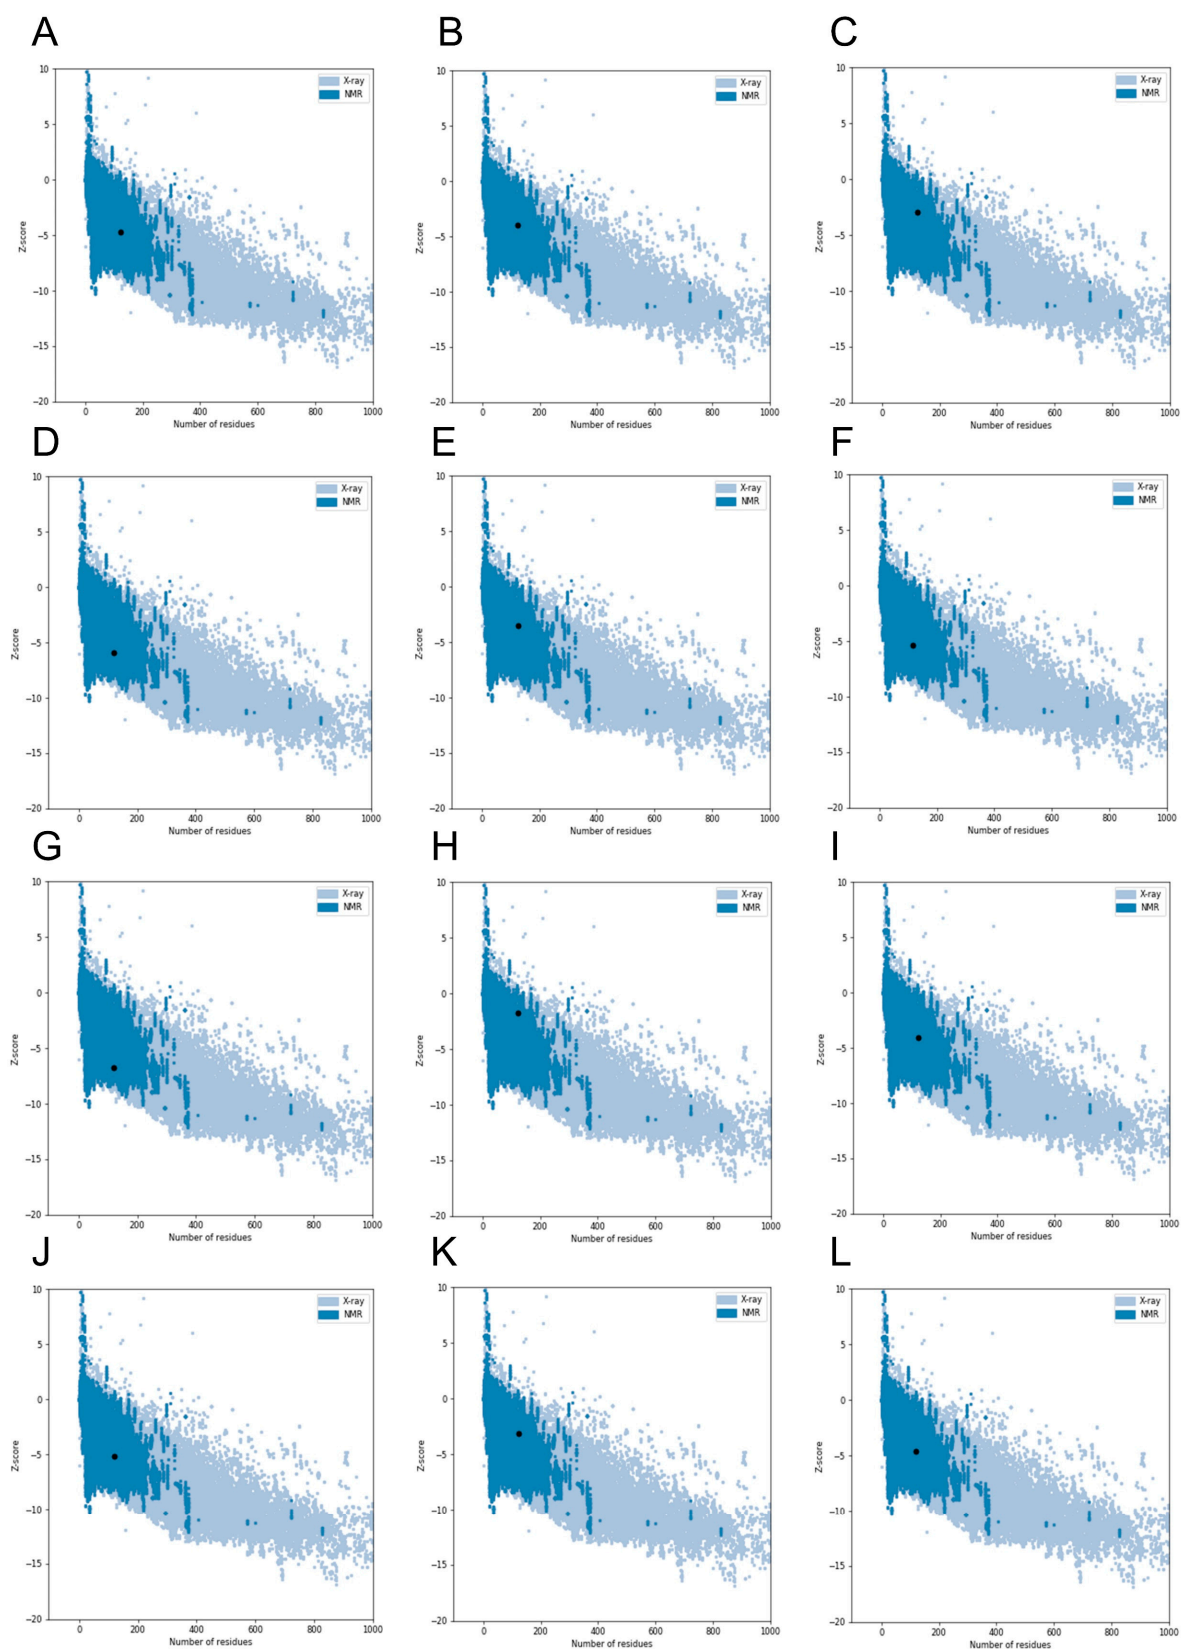

**Figure S3.** Z-plot with significant Z scores that reflect good stereochemical quality of the 12 mAbs. A. Adintrevimab, B. Bamlanivimab, C. Beludavimab, D. Casirivimab, E. cilgavimab, F. Etesevimab, G. Imdevimab, H. Lomtegovimab, I. Regdanvimab, J. romlusevimab, K. sotrovimab, L. Tixagevimab.



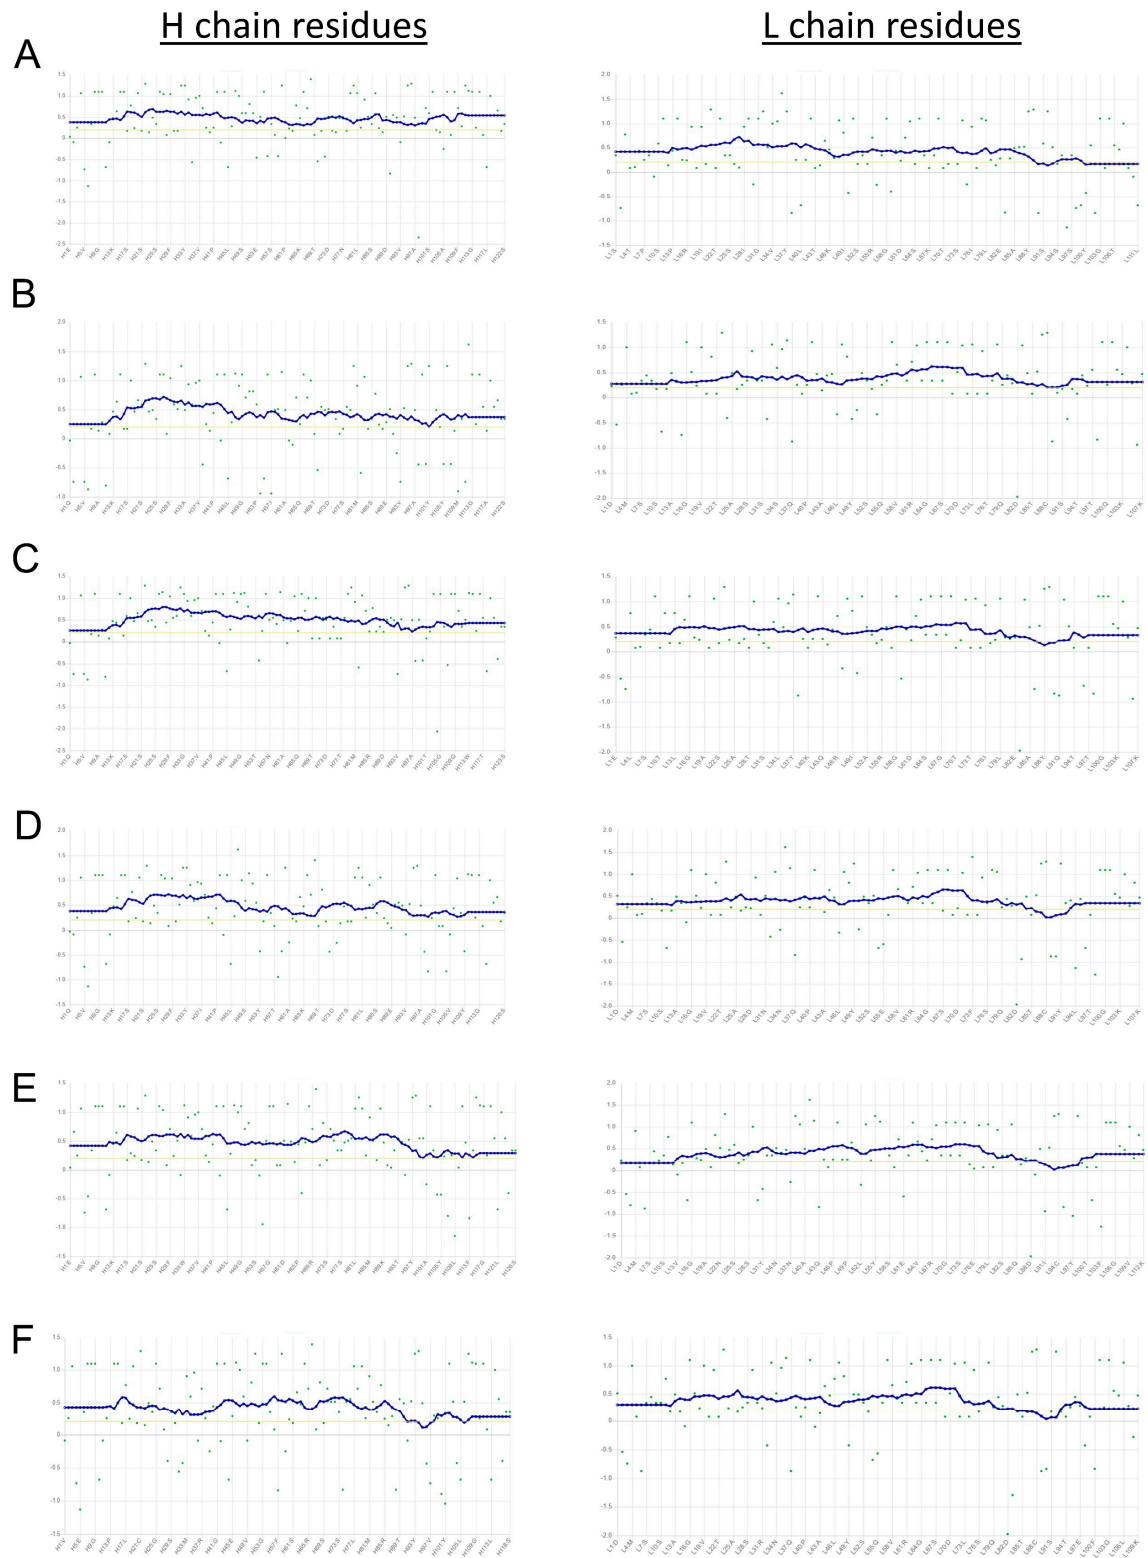

**Figure S4.** Verify 3D plots of 12 mAbs that describe the nature of 3D conformation. A. Adintrevimab, B. Bamlanivimab, C. Beludavimab, D. Casirivimab, E. cilgavimab, F. Etesevimab, G. Imdevimab, H. Lomtegovimab, I. Regdanvimab, J. romlusevimab, K. sotrovimab, L. Tixagevimab.

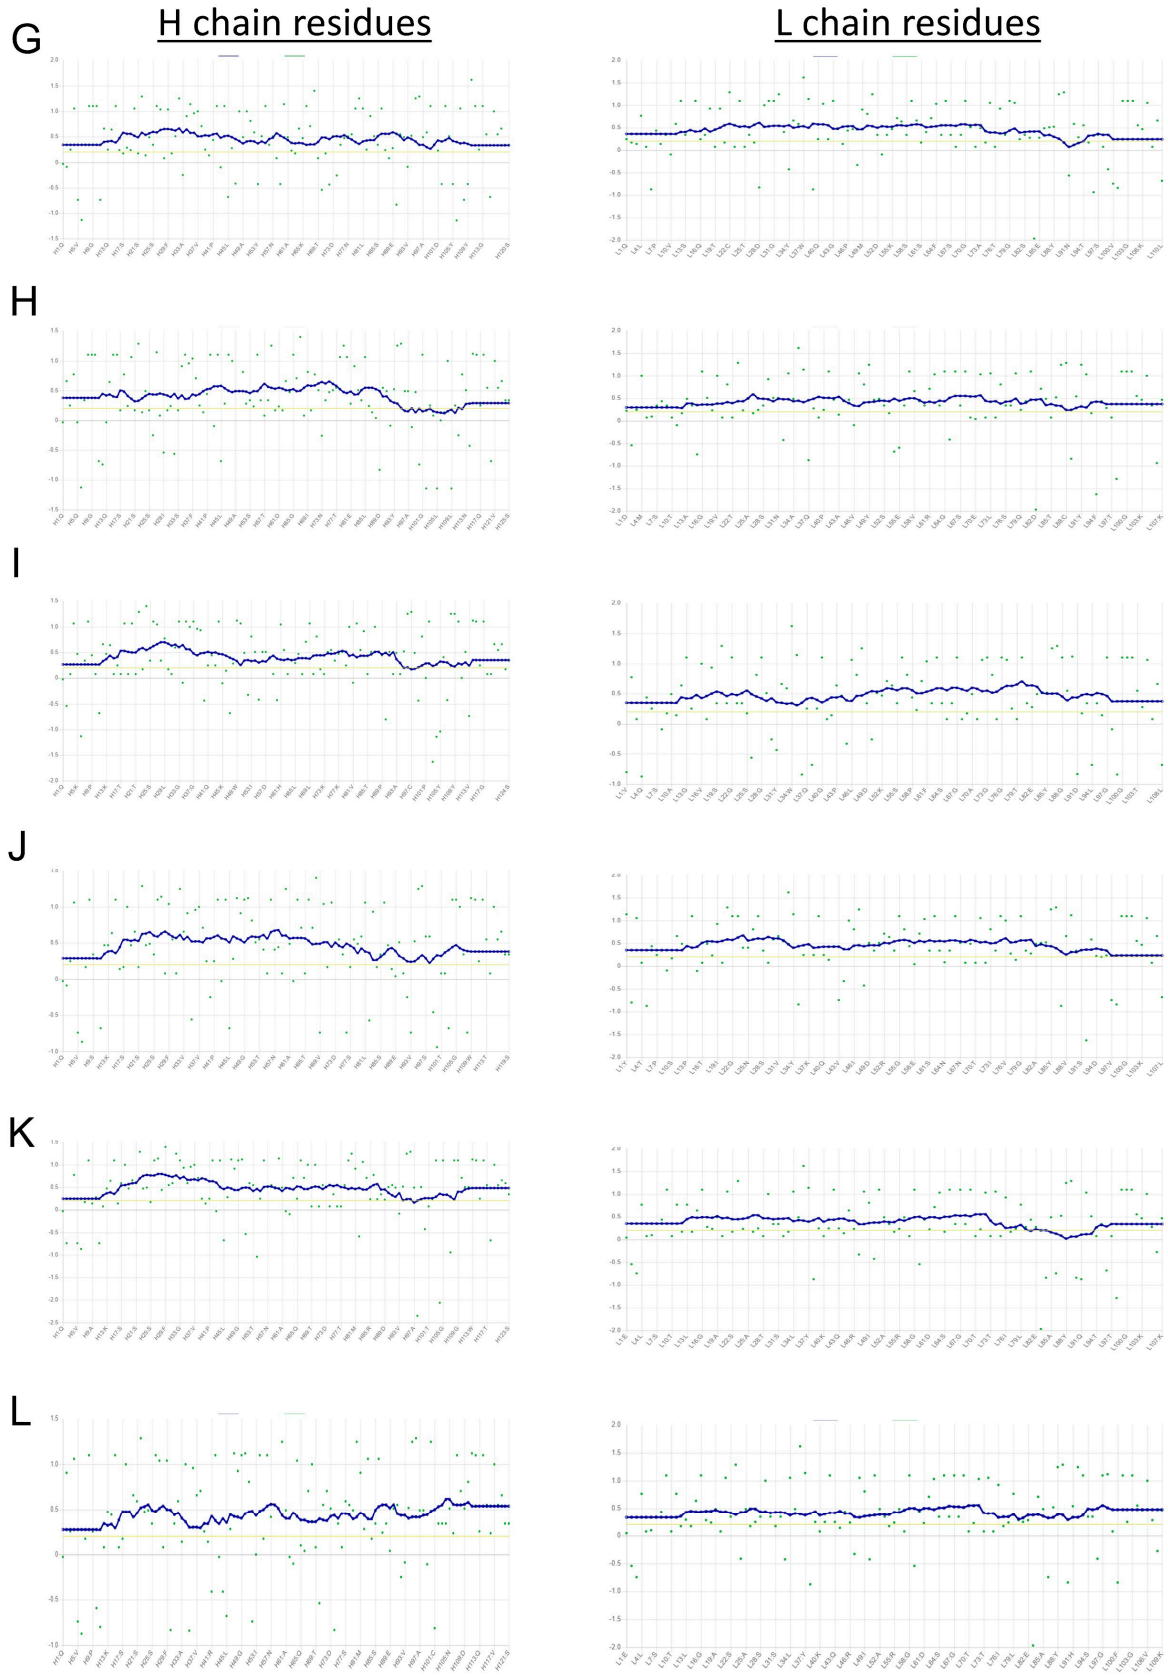

**Figure S4.** (contd.). Verify 3D plots of 12 mAbs that describe the nature of 3D conformation of them respectively. A. Adintrevimab, B. Bamlanivimab, C. Beludavimab, D. Casirivimab, E. cilgavimab, F. Etesevimab, G. Imdevimab, H. Lomtegovimab, I. Regdanvimab, J. romlusevimab, K. sotrovimab, L. Tixagevimab.



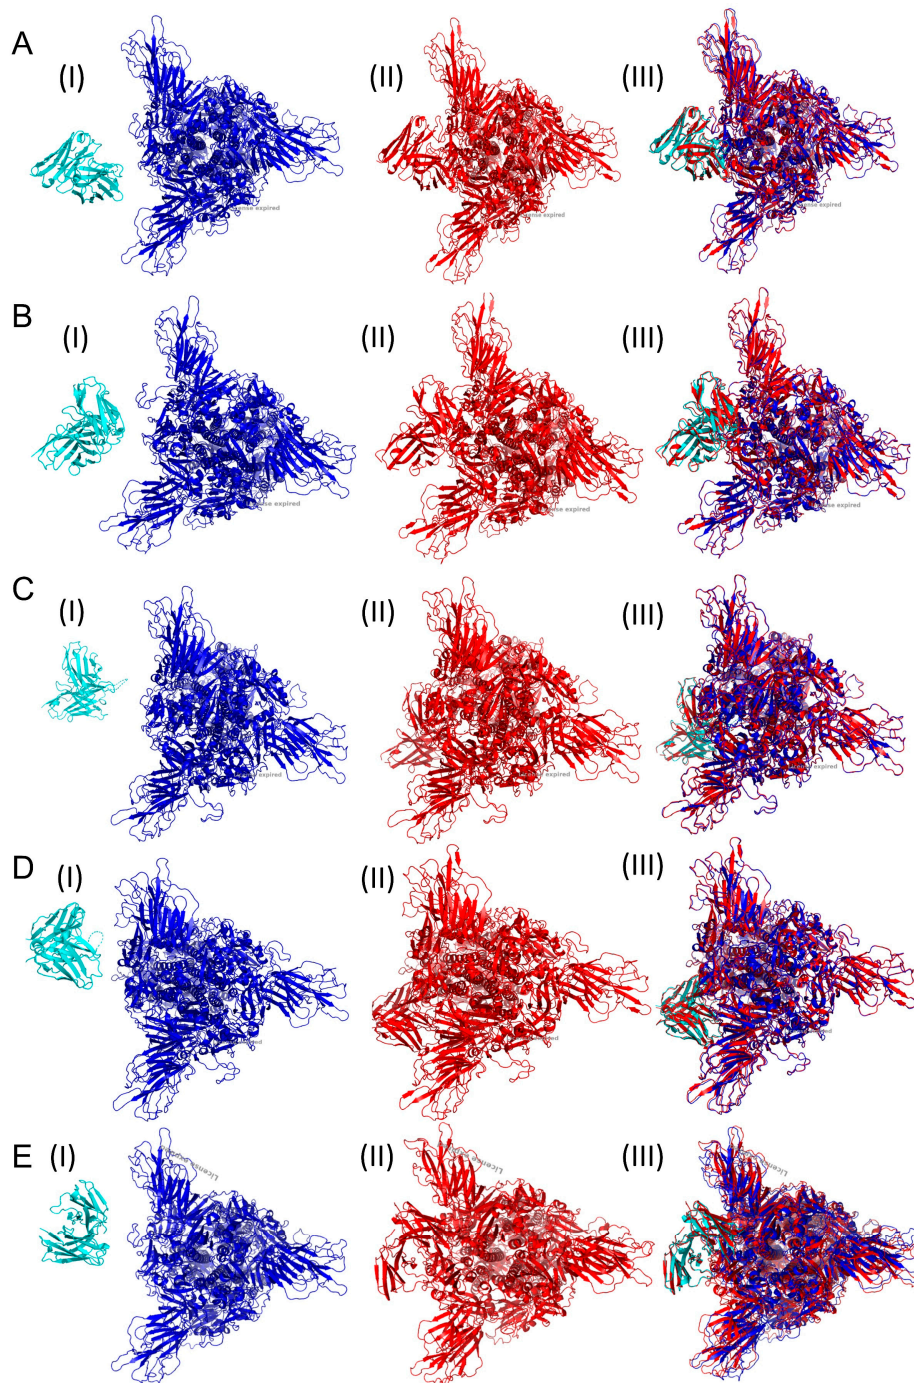

**Figure S5.** Conformational changes of the mAbs and the spike proteins of the Omicron due to the formation of mAb-spike protein complex. A. 3D structure of (i) unbound adintrevimab and G339D mutant spike protein of Omicron (shown in cyan and blue, respectively) and (ii) adintrevimab\_G339D complex (shown in red). (iii) Superimposed bound and unbound forms of adintrevimab and G339D mutant spike protein. B. 3D structure of (i) unbound beludavimab and S371L mutant spike protein of Omicron (shown in cyan and blue, respectively) and (ii) beludavimab\_S371L complex (shown in red). (iii) Superimposed bound and unbound forms of beludavimab and S371L mutant spike protein. C. 3D structure of (i) unbound cilgavimab and G142D mutant spike protein of Omicron (shown in cyan and blue, respectively) and (ii) cilgavimab\_G142D complex (shown in red). (iii) Superimposed bound and unbound forms of cilgavimab\_G142D mutant spike protein. D. 3D structure of (i) unbound regdanivimab and N440K mutant spike protein of Omicron (shown in cyan and blue, respectively) and (ii) regdanivimab\_N440K complex (shown in red). (iii) Superimposed bound and unbound forms of regdanivimab and N440K mutant spike protein. E. 3D structure of (i) unbound romlusevimab and D614G mutant spike protein of Omicron (shown in cyan and blue, respectively) and (ii) romlusevimab\_D614G complex (shown in red). (iii) Superimposed bound and unbound forms of romlusevimab and D614G mutant spike protein.

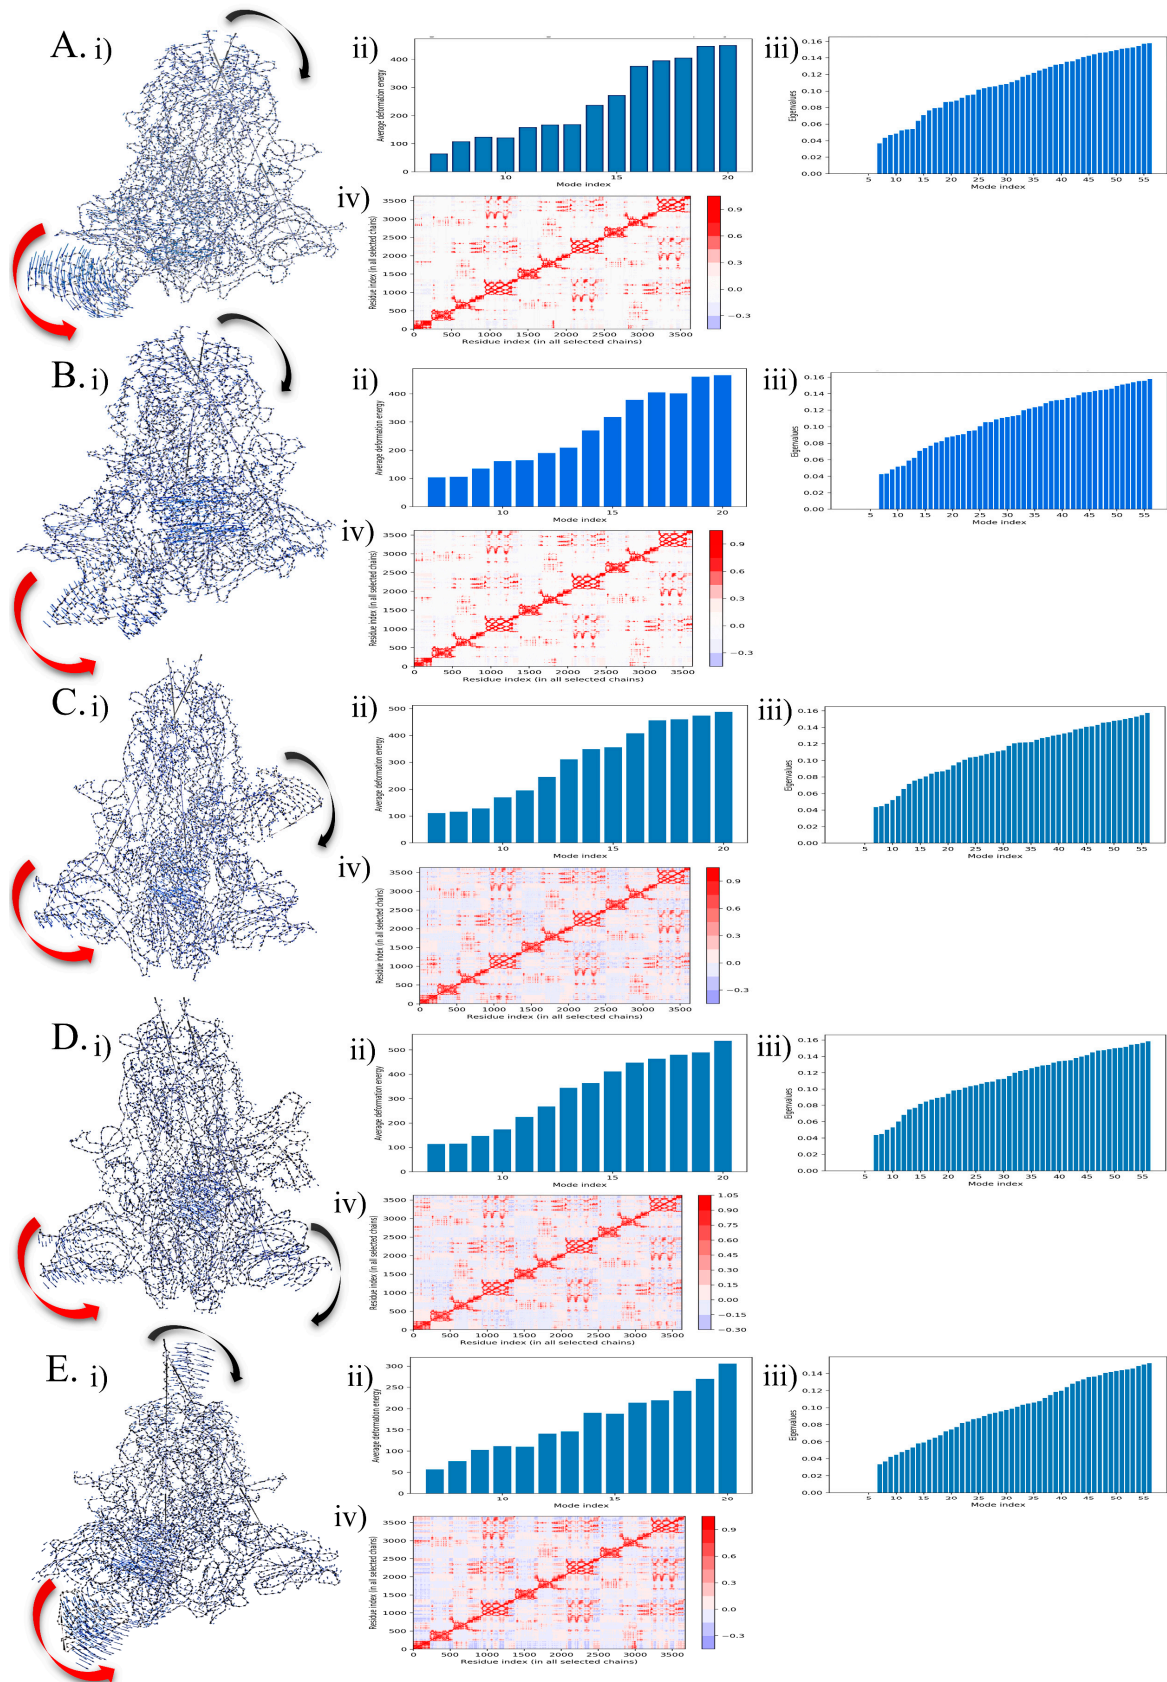

**Figure S6.** Comparative analyses of normal modes of 5 mAb-omicron spike protein complexes. A. adintrevimab\_G339D, B. beludavimab\_S371L, C. cilgavimab\_G142D, D. regdanivimab\_N440K and E. romlusevimab\_D614G respectively. (i). Visualization of molecular motion. (ii). Illustration of deformation energies of different modes. (iii). Eigenvalues. (iv). Correlation matrix that facilitates understanding of correlated (shown in red), uncorrelated (shown in white) and anti-correlated (shown in blue) motions of C $\alpha$  atoms.

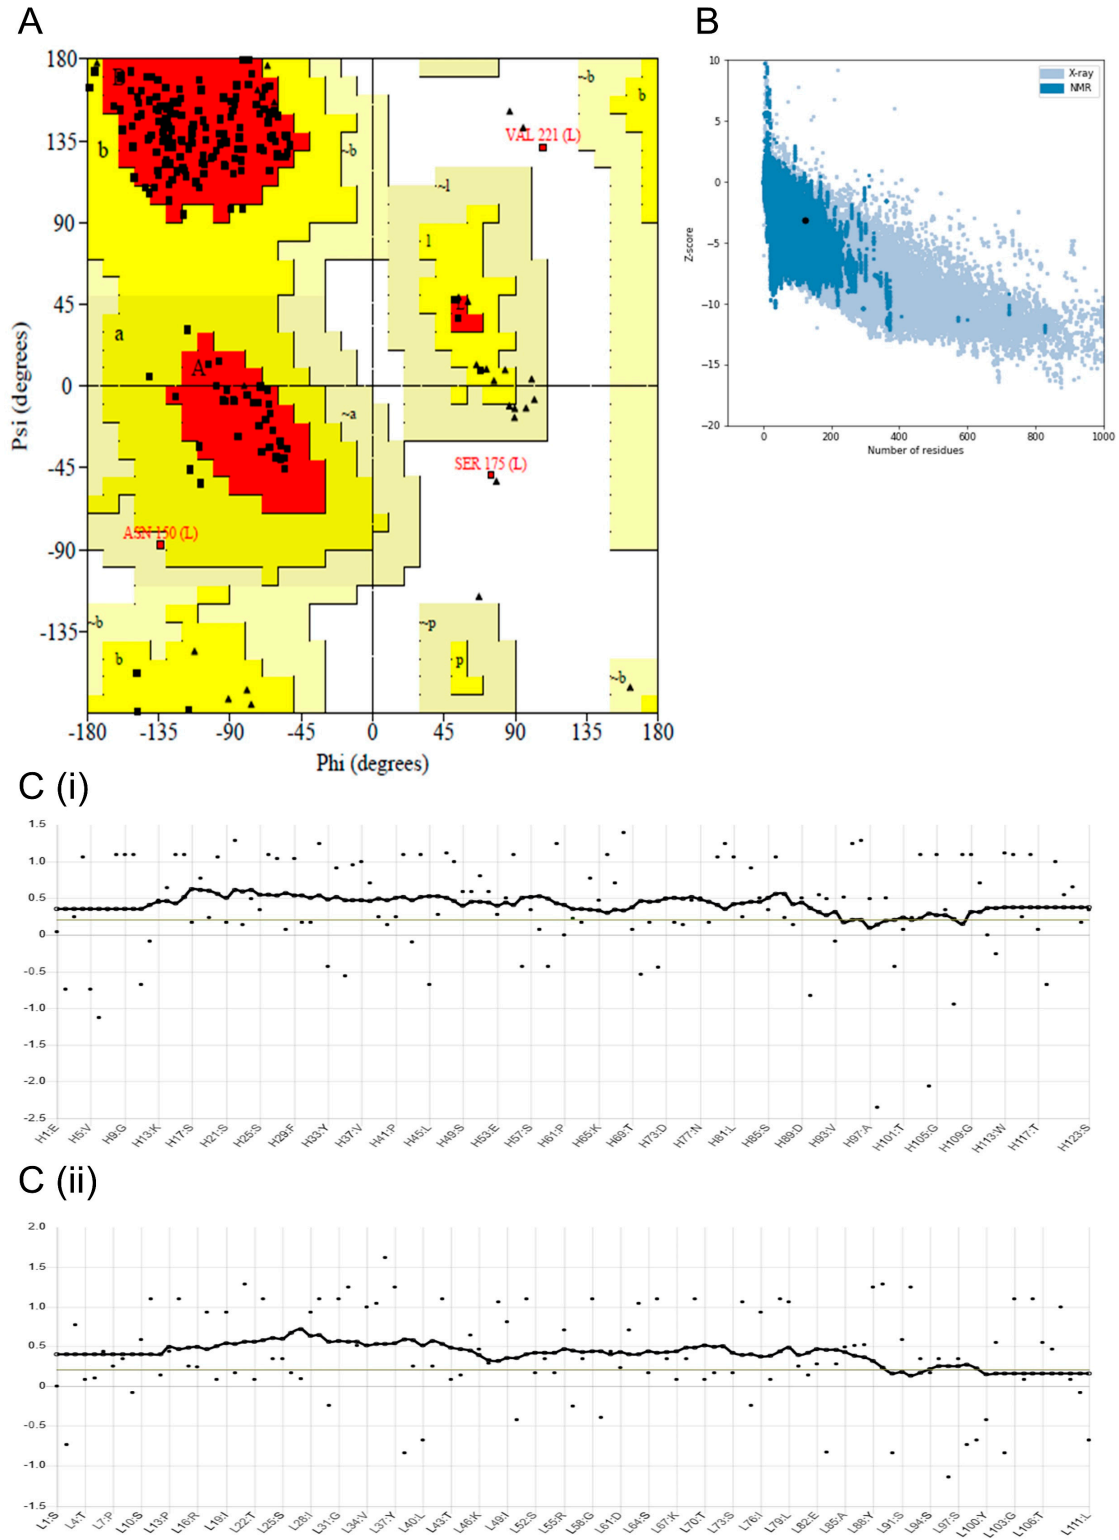

**Figure S7.** Stereochemical quality of the 3D conformation of the Adintrevimab-Framework-Be-ludavimab-CDRH3 chimeric mAb by A. Ramachandran plot, B. Z-Score, and, C. VERIFY 3D (where C(i) is directing heavy chain and C(ii) light chain).



### Amino acid fasta sequence of the adintrevimab-framework-beludavimab-CDRH3 chimeric antibody

```
>ADIN_FM_BELU_CDRH3_Chimeric_H
EVQLVESGGGLVKPGGSLRLSCAASGFTFSSYYMNWVRQAPGKGLE
WVSSISEDGYSTYYPD SLKGRFTISRDSA KNSLYLQMNSLRADDTAV
YYCARDYTRGWGSIGGFDNWGQGTLVTVSS
>ADIN_FM_BELU_CDRH3_Chimeric_L
SVLTQPPSVSGAPGQRITISCTGSSSNIGAGYDVHWYQQLPGTAPKLL
IYGSSSRNSGVPDRFSGSKSGTSASLAITGLQAEDEADYYCQSYDSSL
SVLYTFGTGTKVTVL
```

### Deduced nucleic acid sequence of the adintrevimab-framework-beludavimab-CDRH3 chimeric antibody

```
> Adintrevimab-framework-Beludavimab-CDRH3
gargtncarytngtngarwsnggngngngnytngtnaarccngnggnwsnytnmgnytnwsntg
ygcngcnwsnggnttyacnttywsnwsntaytayatgaaytgggtmngncargcncnggnaargg
nytngartgggtwnswsnathwsngargayggntaywsnacntaytayccngaywsnytnaargg
nmgnttyacnathwsnmngaywsngcnaaraaywsnytnayytncaratgaaywsnytnmgng
gcngaygayacngcngntntaytaytgygcnmngaytayacnmngngntgggggnwsnathggng
gnttygayaaytggggncarggnacnytngtnacngtnwsnwsnwsngtnytnacnarcncncnw
sngtnwsnggngcncnggncarmgnathacnathwsntgyacnggnwsnwsnwsnaayathg
gngcnggntaygaygtncaytggtaycarcarytncnggnacngcncnaarytnytnathtayggn
wsnwsnwsnmgnaaywsnggngtncngaymgnttywsnggnwsnaarwsnggnacnwsng
cnwsnytngcnathacnggnytnargcngargaygargcngaytaytaytgycarwsntaygayws
nwsnytnwsngtnytnayacnttyggnacnggnacnaargtnacngtnytn
```

**Figure S8.** Amino acid and deduced nucleic acid sequences of Adintrevimab-Framework-Beludavimab-CDRH3 chimeric mAb.

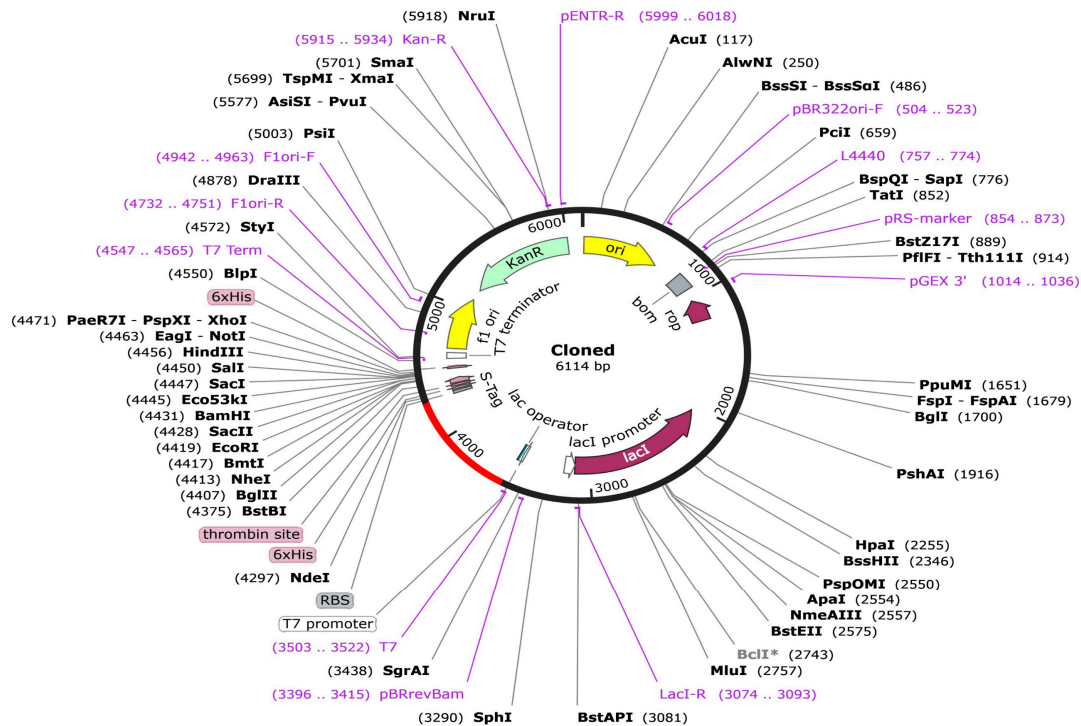

**Figure S9.** In-silico cloning of a chimeric mAb. Gene sequence of Adintrevimab-Framework-Beludavimab-CDRH3 chimeric mAb was cloned into pET30ax expression vector. The mAb region is represented by red color. We performed reverse translation and codon optimization of the chimeric mAb employing Java Codon Adaptation Tool (JCat) (<http://www.jcat.de/Start.jsp>, accessed on 6 June 2022) for the therapeutic and safety validation. Next, we explored Addgene database (<https://www.addgene.org/>, accessed on 6 June 2022) for screening the most suitable prokaryotic expression vector and the cDNA of the chimeric mAb was eventually cloned in-silico using the molecular cloning tool SnapGene tool (<https://www.snapgene.com/>, accessed on 6 June 2022). Recombinant production of mAb is crucial for the validation of the in-silico findings. Keeping this in mind, we transformed the amino acid sequence of heavy and light chain of Adintrevimab-Framework-Beludavimab-CDRH3 chimeric mAb in FASTA format and the cDNA sequence was deduced following codon optimization to express in *E. coli* K12 strain. XbaI restriction sites were added at both 5' and 3' terminal of mAb cDNA that facilitated the cloning in pET30ax vector (5406 bp) and construction of the recombinant plasmid. The modified cloned gene for expressing the recombinant mAb is 708bp long.
